# Supplementary material
Source: PubMed Central journal article supplement (PMC3076823)
Supplement: 1018593108_pnas.201018593SI.pdf [file 1018593108_pnas.201018593SI.pdf]

# Supporting Information

Paredes et al. 10.1073/pnas.1018593108

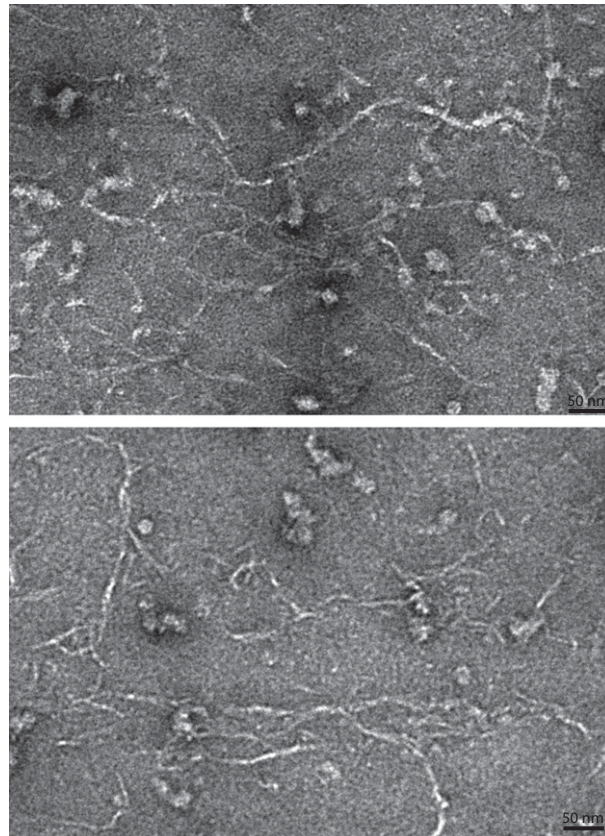

**Fig. S1.** TEM of negatively stained giActin. Shown are two micrographs of negatively stained giActin filaments. (Scale bar, 50 nm.)

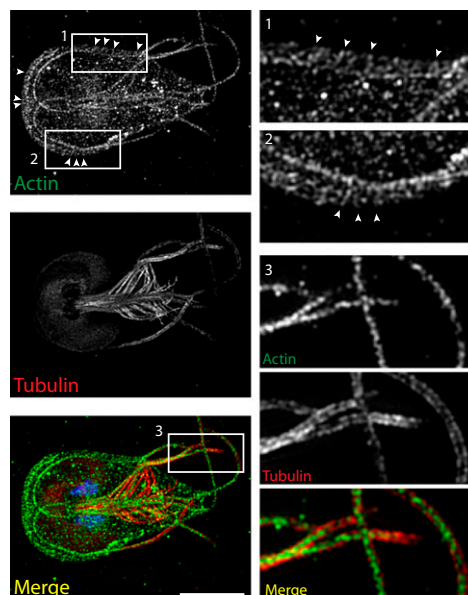

**Fig. S2.** 3D-SIM analysis of the *Giardia* cytoskeleton. Actin is green, tubulin is red, and DNA is blue. Note that C-shaped filaments are clearly observed all along the side of the trophozoites, indicated by white arrowheads in box 1 and box 2. Also note the repeating zig-zag pattern of actin within the flagellar axoneme, box 3. (Scale bar, 5  $\mu$ m.)

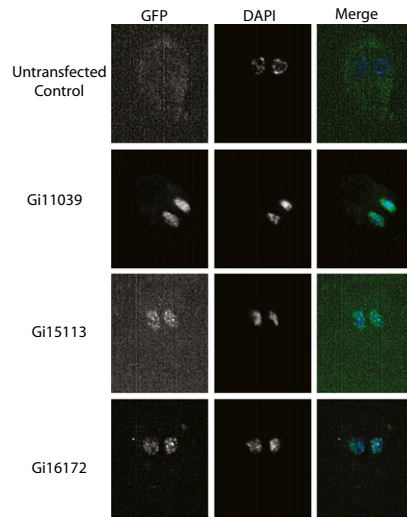

**Fig. S3.** Localization of the ARPs in *Giardia*. An untransfected control is compared with N-terminal GFP fusions to giARP ORF 11039, 15113, and 16172. All three giARPs are found in the nuclei. GiORF sequences are available from [www.giardadb.org](http://www.giardadb.org).

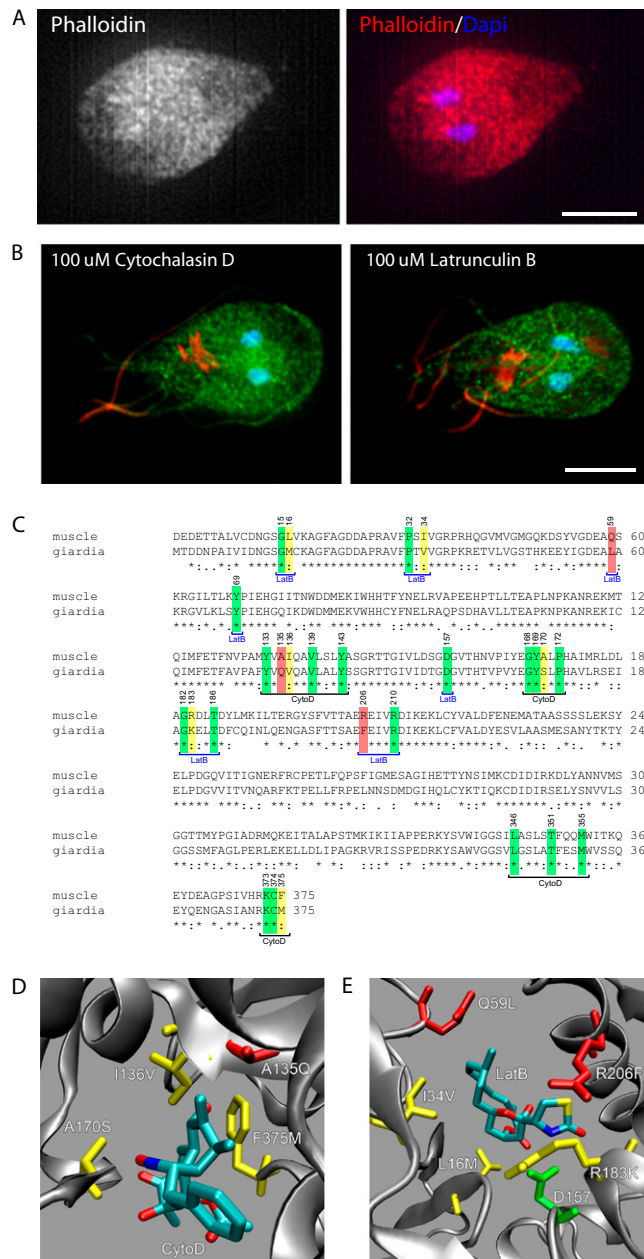

**Fig. 54.** *Giardia* actin has reduced affinity for phalloidin, cytochalasin D, and latrunculin B. (A) Representative *Giardia* trophozoite fixed as in Fig. 2 and stained with rhodamine-phalloidin and DAPI. Note the diffuse staining pattern and the lack of any distinct structure. (B) Representative *Giardia* trophozoites exposed to 100  $\mu$ M cytochalasin D or latrunculin B for 24 h. Actin is in green and tubulin in red. Note overall organization is unaffected by drug treatment. (C) Alignment of giActin with muscle actin highlighting key residues for coordinating cytochalasin D and latrunculin A drug binding. Conserved residues are in green, similar residues are in yellow, and nonconservative substitutions are in red. The indicated substitutions are consistent with reduced drug affinity. (D) Model of cytochalasin binding. Key residues in the cytochalasin binding pocket have substitutions that are likely to disrupt drug binding. A135 is substituted with a much larger and polar glutamine in giActin. Also, amino acid I36 has been substituted for the smaller valine, and apolar A170 has been substituted for polar serine. (E) Model of latrunculin binding. The muscle actin drug-binding pocket has a strong positive density, which is disrupted in *Giardia*. There are also two important polar-to-nonpolar substitutions, R206F and Q59L. Additionally, Q59 normally occupies the same space as bound latrunculin and is thought to move out of position as R206 (F206 in *Giardia*) forms a salt bridge with latrunculin. The substitution R183K sterically blocks D157 from hydrogen bonding to latrunculin, further reducing the likelihood of actin binding. (Scale bar, 5  $\mu$ m.)

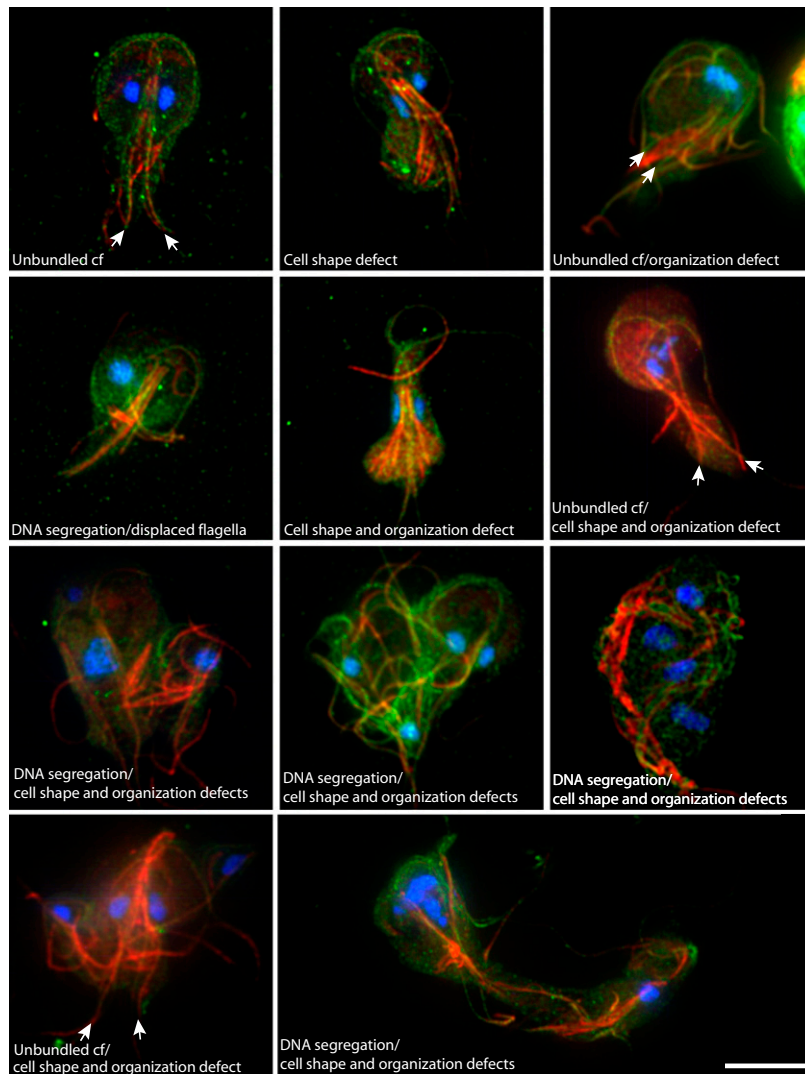

**Fig. S5.** Additional examples of knockdown phenotypes. Immunofluorescence projections of actin knockdown trophozoites. Actin is green, tubulin is red, and DNA is blue. Arrows indicate unbundled caudal flagella. Note indicated cell shape, polarity, organization, and DNA segregation defects. (Scale bar, 5  $\mu$ m.)

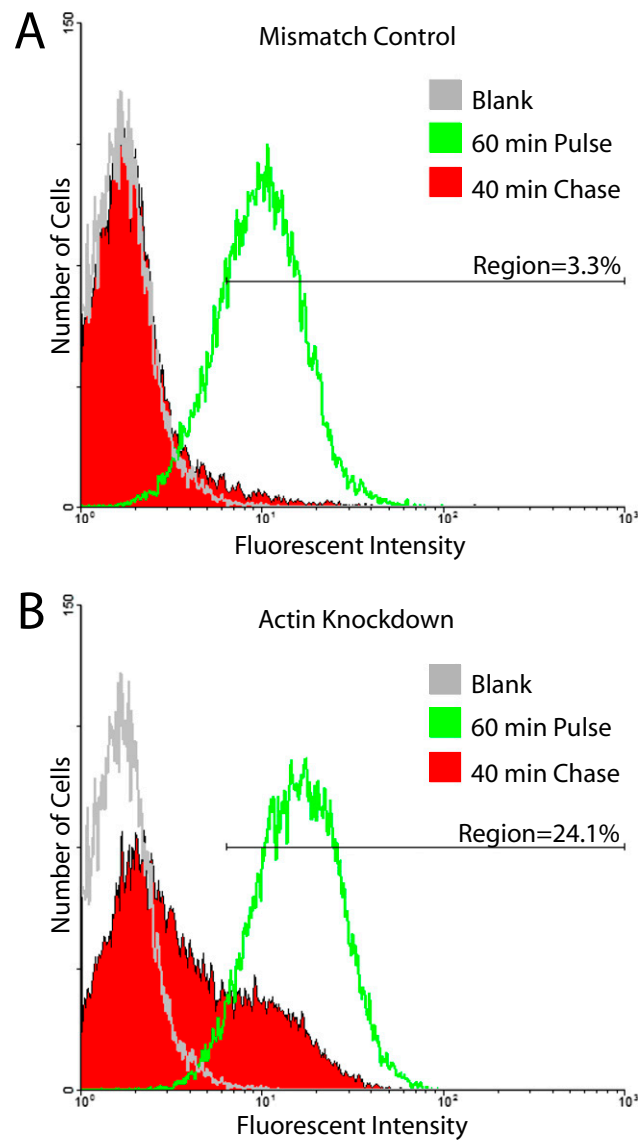

**Fig. 56.** Actin is required for processing Lucifer yellow subsequent to fluid-phase endocytosis. (A) Mismatch control. (B) *giActin* knockdown cells were pulsed with Lucifer yellow for 1 h and chased for 40 min. Treatments were analyzed by flow cytometry. The data shown are representative of the three experimental replicates. Average remaining fluorescence of control experiments is  $3.2 \pm 1\%$  and average of actin kDa is  $30.4 \pm 8.6\%$ .

**Table S1. List of *Giardia* and *Spironucleus* cytoskeleton components**

| Microtubule cytoskeleton | <i>Giardia</i> ORF     | <i>Spironucleus</i> (EST cluster)                                     |
|--------------------------|------------------------|-----------------------------------------------------------------------|
| Centrin                  | 6744; 104685           | 2917526:1                                                             |
| Dynein heavy chain       | 16804; 37985; 111950   | 2915954:1; 2918270:1                                                  |
| Dynein heavy chain       | 10538; 94440; 40496    | 2915443:2; 2918316:1                                                  |
| Dynein heavy chain       | 17478; 101138; 17265   | 2915443:1; 2917680:1                                                  |
| Dynein heavy chain       | 17243; 93736; 8172     | 2918316:2                                                             |
| Dynein heavy chain       | 100906; 103059; 42285  | 2918270:2                                                             |
| EB1                      | 14048                  | Not found                                                             |
| Tubulin alpha            | 103676; 112079         | 2916270:6; 2916270:5; 2916270:1; 2916270:2                            |
| Tubulin beta             | 101291; 136020; 136021 | 2916270:6; 2916270:5; 2916270:1; 2916270:2                            |
| Tubulin gamma            | 114218                 | 2916270:6; 2916270:5; 2916270:1;                                      |
| Radial spoke protein     | 16450                  | Not found                                                             |
| IFT188                   | 16660                  | Not found                                                             |
| Katanin p60              | 15368                  | 2916306:1; 2916306:2; 2916245:2; 2916245:1;<br>2915298:1; 2917083:150 |
| Kinesin-1 (KIF5A)        | 13825                  | 2917377:1; 2917178:2; 2916192:2; 2918191:1                            |
| Kinesin-2 (KIF3A)        | 16456; 17333,          | 2917377:1; 2917178:2; 2916192:2; 2918191:1                            |
| Kinesin-5 (KIF11)        | 16425                  | 2916192:2; 2917377:1; 2917178:2; 2918191:1                            |
| Kinesin-13 (KIF2A)       | 16945                  | 2917377:1; 2916192:2; 2917178:2; 2918191:1                            |
| Actin cytoskeleton       | <i>Giardia</i> ORF     | <i>Spironucleus</i> (EST cluster)                                     |
| Actin                    | 40817                  | 2916433:1;* 2916973:1;† 2916014:1;‡ 2916254:15†                       |
| Actin-related protein    | 15113; 16172; 11039    | 2915520:1†                                                            |
| ABP1/drebrin             | None                   | Not found                                                             |
| AIP1                     | None                   | Not found                                                             |
| Alpha-actinin            | None                   | 2915375:3 (coiled coil protein $P = 1.3e-20$ )                        |
| Capz/capping protein     | None                   | Not found                                                             |
| Clathrin                 | 102108                 | 2915858:8                                                             |
| Coronin                  | None                   | Not found                                                             |
| Dynamin                  | 14373                  | 2916220:3; 2916220:2                                                  |
| Cofilin                  | None                   | Not found                                                             |
| Dynactin                 | None                   | Not found                                                             |
| EPS15                    | None                   | Not found                                                             |
| Fimbrin/plastin          | None                   | 2915913:2 (matches CH domain $P = 1.9e-24$ )                          |
| Formin                   | None                   | Not found                                                             |
| Gelsolin                 | None                   | Not found                                                             |
| Myosin                   | None                   | Not found                                                             |
| Profilin                 | None                   | Not found                                                             |
| Scar                     | None                   | Not found                                                             |
| Tropomyosin              | None                   | Not found                                                             |
| Wasp                     | None                   | Not found                                                             |

The indicated human sequence was blasted against the *Giardia* genome and the *Spironucleus* EST cluster collection. *Giardia* ORF or *Spironucleus* EST cluster hits ( $P < 1e-15$ ) are listed. Note that tubulin cytoskeleton components and actin are readily identified, whereas none of the core ABPs are found.

\*EST encodes for svActin with 58% identity to human actin and 61% identity to giActin.

†Partial sequences, cluster with giActin in phylogenetic analysis.

‡EST with 37% identity to human actin weakly clusters with Arp8.

**Table S2. Oligo sequences used in *Materials and Methods***

| Oligo               | Sequence                                                                       |
|---------------------|--------------------------------------------------------------------------------|
| pTetGFPn 15113-F    | aattaTTCGAAatgctcgtgccaagcctctc                                                |
| pTetGFPn 15113-R    | aaacgGCGGCCGctcagaggcgccgctgtcga                                               |
| pTetGFPn 16172-F    | agtagTTCGAAatgacactcattcagctccc                                                |
| pTetGFPn 16172-R    | ttttgGCGGCCGctcacattataccttcatta                                               |
| pTetGFPn 11039-F    | ctttcTTCGAAatggatcaaagccgttttgc                                                |
| pTetGFPn 11039-R    | tactGCGGCCGcttactttgtgcctttccg                                                 |
| GlySer linker F     | [Phos]gtacaagtcggaggcgaggagcggcgggggaagcgttcgaattctgcagtcgcgggcccgggatccgc     |
| GlySer linker R     | [Phos]ggccgcggatcccgggcccgcactgcagaattcgaagcgttcgccccccgctcctccctccgctccggactt |
| BestBac-giActin-F   | tccccgggatgtcgtactaccatcacca                                                   |
| BestBac-giActin-R   | ttggaattctcacatacacttacg                                                       |
| pET30C(+) giActin-F | atgggatatctgatgacagacgacaacctgac                                               |
| pET30C(+) giActin-R | cgcaagctttcacatacacttacggtttg                                                  |
| Rac_NF              | atgactagtacaggaaatgaggatac                                                     |
| Rac_CR              | CTAGAATATAACACACTTTCCCTTTC                                                     |
| Rac_CA-F            | tgcgggccTggaggatta                                                             |
| Rac_CA-R            | TAATCCTCCAGGCCCGCA                                                             |
| Actin morpholino    | GCAGGGTTGTCGTCTGTcATTTTAC                                                      |
| 5x Mis morpholino   | GCAcGGTTcTcTCTGTcATTTaC                                                        |

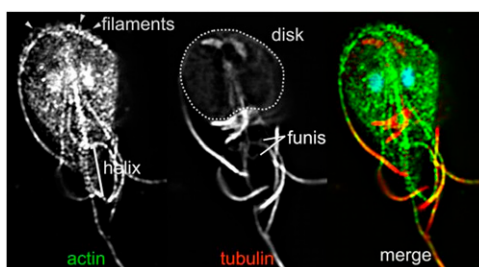

**Movie S1.** Z-series through the interphase trophozoite in Fig. 2. Note the helix bundling the caudal flagella (bracket) and the short filaments along the anterior (arrowheads).

[Movie S1](#)

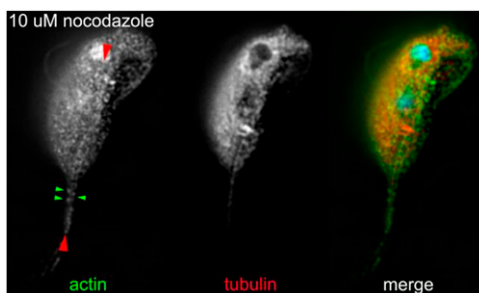

**Movie S2.** Z-series through a trophozoite exposed to 10  $\mu$ M nocodazole for 6 h. Microtubules are red, actin is green, and DNA is blue. As a result of microtubule depolymerization, the cell rounded up, causing the resistant caudal axonemes to protrude from the cell, improving visibility of the actin helix marked by red arrowheads. Green arrowheads indicate a region where several loops of the helix can be followed around the caudal flagella.

[Movie S2](#)

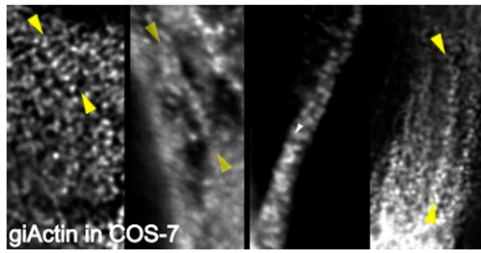

**Movie S3.** Z-series through COS-7 cells expressing giActin. Yellow arrowheads mark giActin helices. White arrowhead follows the path of one coil through the image stack.

[Movie S3](#)
